# Supplementary material for: Prevalence and risk factors associated with under-five mortality in the Solomon Islands: an investigation from the 2015 Solomon Islands demographic and health survey data
Source: PubMed Central journal article supplement (PMC10166993; doi:10.1016/j.lanwpc.2023.100691), 2023-01-23
Supplement: mmc1.pdf [file mmc1.pdf]

## Supplementary files

### Table of Contents

|                                                                                                                                                                                                             |    |
|-------------------------------------------------------------------------------------------------------------------------------------------------------------------------------------------------------------|----|
| <b>Supplementary file 1.</b> Unadjusted and adjusted analysis of sociodemographic, maternal health and behavioural risks for neonatal mortality of the 2015 SIDHS.....                                      | 2  |
| <b>Supplementary file 2.</b> Unadjusted and adjusted analysis of sociodemographic, maternal health and behavioural risks for infant mortality of the 2015 SIDHS.....                                        | 4  |
| <b>Supplementary file 3.</b> Unadjusted and adjusted analysis of sociodemographic, maternal health and behavioural risks for child mortality of 2015 SIDHS. ....                                            | 6  |
| <b>Supplementary file 4.</b> Unadjusted and adjusted analysis of sociodemographic, maternal health and behavioural risks for under-five mortality of 2015 SIDHS. ....                                       | 8  |
| <b>Supplementary file 5.</b> Population attributable fractions of sociodemographic, maternal health and behavioural risks for neonatal, infant, child and under-five mortality in the Solomon Islands ..... | 10 |

**Supplementary file 1.** Unadjusted and adjusted analysis of sociodemographic, maternal health and behavioural risks for neonatal mortality of the 2015 SIDHS.

| COVARIATE AND GROUP                                                                          | NEONATAL MORTALITY |            |                      |                      |
|----------------------------------------------------------------------------------------------|--------------------|------------|----------------------|----------------------|
|                                                                                              | Number (%)         |            | OR 95% CI            |                      |
|                                                                                              | No (%)             | Yes (%)    | CRR                  | ARR                  |
| <i>Sociodemographic, behavioural, health characteristics, weighted population (n = 4334)</i> |                    |            |                      |                      |
| <b>Marital status</b>                                                                        |                    |            |                      |                      |
| In union                                                                                     | 3910(90.94)        | 30(93.10)  | <b>Reference</b>     |                      |
| Not in union                                                                                 | 390(9.06)          | 2(6.90)    | 0.74 (0.16, 3.47)    |                      |
| <b>Religion<sup>1</sup></b>                                                                  |                    |            |                      |                      |
| Anglican                                                                                     | 1302(30.27)        | 14(42.93)  | 3.12 (0.99, 9.89)    | 2.78 (0.89, 8.65)    |
| Roman Catholic                                                                               | 954(22.19)         | 11(33.97)  | 3.36 (1.17, 9.70)    | 3.99 (1.34, 11.88)   |
| Protestant & Pentecostal churches                                                            | 1693(39.36)        | 6 (17.75)  | <b>Reference</b>     | <b>Reference</b>     |
| Minor religion                                                                               | 351(8.17)          | 2(5.35)    | 1.45 (0.29, 7.36)    | 1.62 (0.34, 7.66)    |
| <b>Ethnicity</b>                                                                             |                    |            |                      |                      |
| Melanesian                                                                                   | 4152(96.57)        | 30(94.69)  | <b>Reference</b>     |                      |
| Polynesian                                                                                   | 87(2.02)           | 1(2.98)    | 1.51 (0.16, 13.93)   |                      |
| Micronesian                                                                                  | 56(1.31)           | 1(2.33)    | 1.81 (0.22, 15.09)   |                      |
| <b>Wealth quintile</b>                                                                       |                    |            |                      |                      |
| Poor (Quintiles 1-2)                                                                         | 1939(45.11)        | 17(52.63)  | 1.00 (0.41, 2.48)    | 0.85 (0.34, 2.16)    |
| Middle (Quintile 3)                                                                          | 842(19.59)         | 2(6.37)    | 0.28 (0.06, 1.32)    | 0.22 (0.05, 0.94)    |
| High (Quintiles 4-5)                                                                         | 1518(35.31)        | 13(41.01)  | <b>Reference</b>     | <b>Reference</b>     |
| <b>Place of residence</b>                                                                    |                    |            |                      |                      |
| Urban                                                                                        | 755(17.55)         | 7(20.24)   | <b>Reference</b>     |                      |
| Rural                                                                                        | 3545(82.45)        | 26(79.76)  | 0.84 (0.38, 1.87)    |                      |
| <b>Maternal age (years)</b>                                                                  |                    |            |                      |                      |
| ≤20                                                                                          | 1064(24.75)        | 6(17.71)   | 0.57 (0.07, 4.41)    | 0.37 (0.04, 3.18)    |
| 21-34                                                                                        | 2227(51.80)        | 15(46.76)  | <b>Reference</b>     | <b>Reference</b>     |
| 35-49                                                                                        | 1008(23.45)        | 11(35.52)  | 1.73 (0.82, 3.64)    | 1.54 (0.64, 3.71)    |
| <b>Maternal education</b>                                                                    |                    |            |                      |                      |
| Primary & lower                                                                              | 2481(57.70)        | 17(53.59)  | 0.84 (0.40, 1.80)    |                      |
| Secondary & above                                                                            | 1814(42.20)        | 15(46.41)  | <b>Reference</b>     |                      |
| <b>Household member</b>                                                                      |                    |            |                      |                      |
| 1-5                                                                                          | 1617(37.61)        | 16(49.41)  | <b>Reference</b>     | <b>Reference</b>     |
| > 5                                                                                          | 2683(62.39)        | 16(50.59)  | 0.61 (0.38, 0.97)    | 0.58 (0.28, 1.21)    |
| <b>Birth order</b>                                                                           |                    |            |                      |                      |
| 1 <sup>st</sup> children                                                                     | 670(15.57)         | 5(16.56)   | 1.32 (0.48, 3.61)    |                      |
| 2 <sup>nd</sup> - 4 <sup>th</sup> children                                                   | 2484(57.77)        | 15(46.52)  | <b>Reference</b>     |                      |
| 5 <sup>th</sup> children and above                                                           | 1146(26.66)        | 12(36.92)  | 1.71 (0.78, 3.75)    |                      |
| <b>Sex of child</b>                                                                          |                    |            |                      |                      |
| Male                                                                                         | 2233(51.92)        | 15(47.45)  | <b>Reference</b>     |                      |
| Female                                                                                       | 2067(48.08)        | 17(52.55)  | 1.20 (0.50, 2.85)    |                      |
| <b>Plurality</b>                                                                             |                    |            |                      |                      |
| Single                                                                                       | 4227(98.26)        | 31(97.52)  |                      |                      |
| Multiple gestation                                                                           | 75(1.74)           | 1(2.48)    | 1.43 (0.35, 5.78)    |                      |
| <b>Breastfeeding</b>                                                                         |                    |            |                      |                      |
| Yes                                                                                          | 4086(95.04)        | 11(34.16)  | <b>Reference</b>     | <b>Reference</b>     |
| No                                                                                           | 213(4.96)          | 21(65.84)  | 33.68 (13.92, 81.51) | 34.80 (13.60, 89.03) |
| <b>Tobacco/cigarette history</b>                                                             |                    |            |                      |                      |
| Yes                                                                                          | 728 (16.94)        | 4(11.05)   | 0.61 (0.18, 2.02)    |                      |
| No                                                                                           | 3563(82.87)        | 29(88.95)  | <b>Reference</b>     |                      |
| <b>Alcohol use history</b>                                                                   |                    |            |                      |                      |
| Yes                                                                                          | 247(5.76)          | 4(12.73)   | 2.35 (0.69, 7.98)    | 0.58 (0.28, 1.21)    |
| No                                                                                           | 4019(93.46)        | 28(87.27)  | <b>Reference</b>     | <b>Reference</b>     |
| <b>Kava use history</b>                                                                      |                    |            |                      |                      |
| Yes                                                                                          | 8(1.89)            | 1(2.56)    | 1.36 (0.19, 9.98)    |                      |
| No                                                                                           | 4210(97.93)        | 31(97.44)  | <b>Reference</b>     |                      |
| <b>Marijuana use history</b>                                                                 |                    |            |                      |                      |
| Yes                                                                                          | 92(2.10)           | 1(2.56)    | 1.20 (0.16, 8.92)    |                      |
| No                                                                                           | 4200(97.70)        | 31(97.44)  | <b>Reference</b>     |                      |
| <b>Betel nut use history</b>                                                                 |                    |            |                      |                      |
| Yes                                                                                          | 3619(85.20)        | 76(90.55)  | 1.27 (0.40, 4.01)    |                      |
| No                                                                                           | 626(14.2)          | 8(9.45)    | <b>Reference</b>     |                      |
| <i>Health and reproductive characteristics, weighted population (n = 2706)</i>               |                    |            |                      |                      |
| <b>Antenatal care</b>                                                                        |                    |            |                      |                      |
| Yes                                                                                          | 2323(87.11)        | 37 (91.64) | 2.99 (0.39, 23.05)   |                      |
| No                                                                                           | 344(12.89)         | 3(8.36)    | <b>Reference</b>     |                      |

|                                 |             |           |                     |                      |
|---------------------------------|-------------|-----------|---------------------|----------------------|
| <b>Malaria infection</b>        |             |           |                     |                      |
| Yes                             | 200(7.45)   | 1(3.29)   | 0.48 (0.06, 3.74)   |                      |
| No                              | 1992(74.29) | 16(68.28) | <b>Reference</b>    |                      |
| <b>Postnatal check</b>          |             |           |                     |                      |
| Yes                             | 1714(63.91) | 2(9.91)   | <b>Reference</b>    | <b>Reference</b>     |
| No                              | 959(35.77)  | 19(84.45) | 14.95 (3.12, 71.65) | 11.36 (1.22, 106.16) |
| <b>Place of delivery</b>        |             |           |                     |                      |
| Health facility                 | 1714(63.91) | 2(9.91)   | <b>Reference</b>    |                      |
| Non health facility             | 959(35.77)  | 19(84.45) | 0.46 (0.07, 2.89)   |                      |
| <b>Birth attendant</b>          |             |           |                     |                      |
| High skilled                    | 2063(76.92) | 21(90.34) | <b>Reference</b>    |                      |
| Low or no skilled               | 579(21.60)  | 2(9.66)   | 2.61 (0.65, 10.44)  |                      |
| <b>Birth weight (kilograms)</b> |             |           |                     |                      |
| <2.5 kilograms                  | 230(8.59)   | 3(11.86)  | 2.86 (0.64, 12.78)  | 2.82 (0.61, 12.99)   |
| ≥2.5 kilograms                  | 2050(76.42) | 8(36.65)  | <b>Reference</b>    | <b>Reference</b>     |
| <b>Mode of delivery</b>         |             |           |                     |                      |
| C-section                       | 178(6.64)   | 4(18.30)  | 2.86 (0.81, 10.06)  | 1.06 (0.13, 8.83)    |
| Normal vaginal delivery         | 2130(79.41) | 17(75.32) | <b>Reference</b>    | <b>Reference</b>     |
| <b>Tetanus vaccination</b>      |             |           |                     |                      |
| Yes                             | 2348(87.57) | 18(76.76) | <b>Reference</b>    | <b>Reference</b>     |
| No                              | 326(12.15)  | 5(23.24)  | 2.15 (0.77, 6.05)   | 1.79 (0.19, 16.53)   |

**Footnotes:** Population consists of all births (weighted n=4334) and last births (weighted n=2706) born between 2010 and 2015 of the Solomon Islands demographic health survey.

Adjusted analyses were made for all covariates with p-values less than 0.2

Frequencies (n) were rounded to the nearest whole number

**Abbreviations:** CRR; crude relative risk, ARR; adjusted relative risk.

**Supplementary file 2.** Unadjusted and adjusted analysis of sociodemographic, maternal health and behavioural risks for infant mortality of the 2015 SIDHS.

| COVARIATE AND GROUP                                                            | INFANT MORTALITY                                                                             |           |                     |                     |
|--------------------------------------------------------------------------------|----------------------------------------------------------------------------------------------|-----------|---------------------|---------------------|
|                                                                                | <i>Sociodemographic, behavioural, health characteristics, weighted population (n = 4334)</i> |           |                     |                     |
|                                                                                | Number (%)                                                                                   |           | RR 95% CI           |                     |
|                                                                                | No (%)                                                                                       | Yes (%)   | CRR                 | ARR                 |
| <b>Marital status</b>                                                          |                                                                                              |           |                     |                     |
| In union                                                                       | 3881(90.92)                                                                                  | 62(91.35) | <b>Reference</b>    |                     |
| Not in union                                                                   | 388(9.08)                                                                                    | 6(8.65)   | 0.95 (0.39, 2.33)   |                     |
| <b>Religion</b>                                                                |                                                                                              |           |                     |                     |
| Anglican                                                                       | 1290(30.22)                                                                                  | 25(37.74) | 1.76 (0.80, 3.83)   | 1.71 (0.85, 3.45)   |
| Roman Catholic                                                                 | 948(22.20)                                                                                   | 19(28.40) | 1.80 (0.88, 3.66)   | 1.74 (0.87, 3.48)   |
| Protestant & Pentecostal churches                                              |                                                                                              |           | <b>Reference</b>    | <b>Reference</b>    |
| Minor religion <sup>1</sup>                                                    | 349(8.17)                                                                                    | 4(6.09)   | 1.06 (0.32, 3.44)   | 1.19 (0.41, 3.43)   |
| <b>Ethnicity</b>                                                               |                                                                                              |           |                     |                     |
| Melanesian                                                                     | 4125(96.63)                                                                                  | 62(91.75) | <b>Reference</b>    | <b>Reference</b>    |
| Polynesian                                                                     | 86(2.02)                                                                                     | 2(2.55)   | 1.32 (0.24, 7.29)   | 1.32 (0.17, 10.28)  |
| Micronesian                                                                    | 53(1.24)                                                                                     | 4(5.71)   | 4.57 (1.75, 11.94)  | 5.54 (1.67, 18.35)  |
| <b>Household wealth</b>                                                        |                                                                                              |           |                     |                     |
| Poor (Quintiles 1-2)                                                           | 1921(45.00)                                                                                  | 37(55.30) | 1.13 (0.60, 2.14)   | 1.11 (0.54, 2.30)   |
| Middle (Quintile 3)                                                            | 841(19.70)                                                                                   | 4(6.59)   | 0.31 (0.10, 0.96)   | 0.27 (0.09, 0.82)   |
| High (Quintiles 4-5)                                                           | 1507(35.30)                                                                                  | 26(38.11) | <b>Reference</b>    | <b>Reference</b>    |
| <b>Place of residence</b>                                                      |                                                                                              |           |                     |                     |
| Urban                                                                          | 752(17.61)                                                                                   | 10(15.30) | <b>Reference</b>    |                     |
| Rural                                                                          | 3517(82.39)                                                                                  | 57(84.70) | 1.18 (0.64, 2.18)   |                     |
| <b>Maternal age (years)</b>                                                    |                                                                                              |           |                     |                     |
| ≤20                                                                            | 257(6.02)                                                                                    | 3(3.68)   | 0.59 (0.17, 2.09)   |                     |
| 21-34                                                                          | 3006(70.42)                                                                                  | 50(73.66) | <b>Reference</b>    |                     |
| 35-49                                                                          | 1006(23.57)                                                                                  | 15(22.66) | 0.92 (0.53, 1.60)   |                     |
| <b>Maternal education</b>                                                      |                                                                                              |           |                     |                     |
| Primary & lower                                                                | 2460(57.63)                                                                                  | 40(60.06) | 1.10 (0.62, 1.94)   | 0.49 (0.27, 0.87)   |
| Secondary & above                                                              | 1804(42.26)                                                                                  | 27(39.94) | <b>Reference</b>    | <b>Reference</b>    |
| <b>Household member</b>                                                        |                                                                                              |           |                     |                     |
| 1-5                                                                            | 1601(37.51)                                                                                  | 32(48.27) | <b>Reference</b>    |                     |
| > 5                                                                            | 2667(62.49)                                                                                  | 35(51.73) | 0.65 (0.40, 1.06)   |                     |
| <b>Birth order</b>                                                             |                                                                                              |           |                     |                     |
| 1 <sup>st</sup> children                                                       | 665(15.59)                                                                                   | 9(14.13)  | 1.09 (0.53, 2.25)   | 1.48 (0.69, 3.19)   |
| 2 <sup>nd</sup> - 4 <sup>th</sup> children                                     | 2469(57.85)                                                                                  | 32(47.94) | <b>Reference</b>    | <b>Reference</b>    |
| 5 <sup>th</sup> children and above                                             | 1334(26.56)                                                                                  | 25(37.93) | 1.71 (0.93, 3.15)   | 2.00 (1.03, 3.88)   |
| <b>Sex of child</b>                                                            |                                                                                              |           |                     |                     |
| Male                                                                           | 2217(51.95)                                                                                  | 34(50.80) | <b>Reference</b>    |                     |
| Female                                                                         | 2051(48.05)                                                                                  | 33(49.20) | 1.05 (0.54, 2.03)   |                     |
| <b>Plurality</b>                                                               |                                                                                              |           |                     |                     |
| Single                                                                         | 4196(98.31)                                                                                  | 64(94.80) | <b>Reference</b>    | <b>Reference</b>    |
| Multiple gestation                                                             | 72(1.69)                                                                                     | 3(5.20)   | 3.08 (1.13, 8.40)   | 2.41 (0.77, 7.59)   |
| <b>Breastfeeding</b>                                                           |                                                                                              |           |                     |                     |
| Yes                                                                            | 4059(95.10)                                                                                  | 42(62.14) | <b>Reference</b>    | <b>Reference</b>    |
| No                                                                             | 209(4.90)                                                                                    | 25(37.86) | 10.64 (5.65, 20.04) | 11.85 (6.15, 22.83) |
| <b>Tobacco/cigarette use history</b>                                           |                                                                                              |           |                     |                     |
| Yes                                                                            | 718(16.82)                                                                                   | 16(23.43) | 1.50 (0.74, 3.01)   | 1.42 (0.66, 3.08)   |
| No                                                                             | 3542(82.99)                                                                                  | 51(76.57) | <b>Reference</b>    | <b>Reference</b>    |
| <b>Alcohol use history</b>                                                     |                                                                                              |           |                     |                     |
| Yes                                                                            | 245(5.74)                                                                                    | 7(9.72)   | 1.73 (0.74, 4.08)   | 1.22 (0.43, 3.45)   |
| No                                                                             | 3988(93.46)                                                                                  | 61(90.28) | <b>Reference</b>    | <b>Reference</b>    |
| <b>Kava use history</b>                                                        |                                                                                              |           |                     |                     |
| Yes                                                                            | 81(1.89)                                                                                     | 2(2.35)   | 1.24 (0.30, 5.16)   |                     |
| No                                                                             | 4178(97.93)                                                                                  | 66(97.65) | <b>Reference</b>    |                     |
| <b>Marijuana use history</b>                                                   |                                                                                              |           |                     |                     |
| Yes                                                                            | 90(2.11)                                                                                     | 3(4.06)   | 1.93 (0.60, 6.20)   | 1.60 (0.31, 8.25)   |
| No                                                                             | 4169(97.72)                                                                                  | 64(95.94) | <b>Reference</b>    | <b>Reference</b>    |
| <b>Betel nut use history</b>                                                   |                                                                                              |           |                     |                     |
| Yes                                                                            | 3638(85.26)                                                                                  | 59(88.19) | 1.28 (0.50, 3.30)   |                     |
| No                                                                             | 626(14.66)                                                                                   | 8(11.81)  | <b>Reference</b>    |                     |
|                                                                                |                                                                                              |           |                     |                     |
| <i>Health and reproductive characteristics, weighted population (n = 2706)</i> |                                                                                              |           |                     |                     |
| <b>Antenatal care</b>                                                          |                                                                                              |           |                     |                     |

|                                     |             |           |                   |                   |
|-------------------------------------|-------------|-----------|-------------------|-------------------|
| Yes                                 | 2545(95.43) | 37(92.56) | <b>Reference</b>  |                   |
| No                                  | 122(4.57)   | 3(7.44)   | 1.66 (0.52, 5.29) |                   |
| <b>Malaria in pregnancy</b>         |             |           |                   |                   |
| Yes                                 | 199(7.47)   | 2(4.06)   | 0.53 (0.13, 2.23) |                   |
| No                                  | 1977(74.20) | 31(76.93) | <b>Reference</b>  |                   |
| <b>Postnatal check</b>              |             |           |                   |                   |
| Yes                                 | 1702(63.84) | 16(39.68) | <b>Reference</b>  | <b>Reference</b>  |
| No                                  | 956(35.86)  | 23(56.33) | 2.49 (1.14, 5.43) | 1.58 (0.52, 4.95) |
| <b>Place of delivery</b>            |             |           |                   |                   |
| Health facility                     | 2303(86.37) | 37(92.68) | <b>Reference</b>  |                   |
| Non health facility                 | 346(12.96)  | 3(7.32)   | 0.53 (0.15, 1.83) |                   |
| <b>Birth attendant</b>              |             |           |                   |                   |
| High skilled                        | 2049(76.83) | 37(91.76) | <b>Reference</b>  |                   |
| Low or no skilled                   | 578(21.68)  | 3(8.24)   | 0.32 (0.10, 1.04) |                   |
| <b>Birth weight (kilograms)</b>     |             |           |                   |                   |
| <2.5 kilograms                      | 228(8.55)   | 5(13.18)  | 2.31 (0.78, 6.89) | 1.18 (0.18, 7.97) |
| ≥2.5 kilograms                      | 2037(76.47) | 20(50.37) | <b>Reference</b>  | <b>Reference</b>  |
| <b>Mode of delivery</b>             |             |           |                   |                   |
| C-section                           | 177(6.65)   | 5(12.40)  | 1.82 (0.59, 5.63) | 0.30 (0.02, 3.74) |
| Normal vaginal delivery             | 2116(79.37) | 32(80.28) | <b>Reference</b>  | <b>Reference</b>  |
| <b>Maternal tetanus vaccination</b> |             |           |                   |                   |
| Yes                                 | 2330(87.58) | 36(81.17) | <b>Reference</b>  | <b>Reference</b>  |
| No                                  | 323(12.13)  | 8(18.83)  | 1.59 (0.63, 4.05) | 1.45 (0.31, 6.75) |

**Footnotes:** Population consists of all births (weighted n=4334) and last births (weighted n=2706) born between 2010 and 2015 of the Solomon Islands demographic health survey.

Adjusted analyses were made for all covariates with p-values less than 0.2

Frequencies (n) were rounded to the nearest whole number

**Abbreviations:** CRR; crude relative risk, ARR; adjusted relative risk.

**Supplementary file 3.** Unadjusted and adjusted analysis of sociodemographic, maternal health and behavioural risks for child mortality of 2015 SIDHS.

| COVARIATE AND GROUP                                                            | CHILD MORTALITY                                                                              |           |                    |                    |
|--------------------------------------------------------------------------------|----------------------------------------------------------------------------------------------|-----------|--------------------|--------------------|
|                                                                                | <i>Sociodemographic, behavioural, health characteristics, weighted population (n = 4334)</i> |           |                    |                    |
|                                                                                | Number (%)                                                                                   |           | RR 95% CI          |                    |
|                                                                                | No (%)                                                                                       | Yes (%)   | CRR                | ARR                |
| <b>Marital status</b>                                                          |                                                                                              |           |                    |                    |
| In union                                                                       | 3,865(90.95)                                                                                 | 45(88.56) | <b>Reference</b>   |                    |
| Not in union                                                                   | 385(9.05)                                                                                    | 6(11.44)  | 1.29 (0.52, 3.22)  |                    |
| <b>Religion</b>                                                                |                                                                                              |           |                    |                    |
| Anglican                                                                       | 1,286(30.26)                                                                                 | 15(30.12) | 1.01 (0.46, 2.24)  |                    |
| Roman Catholic                                                                 | 942(22.17)                                                                                   | 14(26.53) | 1.21 (0.61, 2.43)  |                    |
| Protestant & Pentecostal churches                                              | 1673(39.36)                                                                                  | 20(38.71) | <b>Reference</b>   |                    |
| Minor religion <sup>1</sup>                                                    | 349(8.21)                                                                                    | 2(4.64)   | 0.58 (0.12, 2.76)  |                    |
| <b>Ethnicity</b>                                                               |                                                                                              |           |                    |                    |
| Melanesian                                                                     | 4,109 (96.69)                                                                                | 44(85.94) | <b>Reference</b>   | <b>Reference</b>   |
| Polynesian                                                                     | 84(1.97)                                                                                     | 3(6.34)   | 3.53 (1.65, 7.56)  | 3.65 (1.46, 9.10)  |
| Micronesian                                                                    | 52(1.23)                                                                                     | 4(7.72)   | 6.64 (2.86, 15.39) | 5.80 (2.48, 13.53) |
| <b>Household wealth</b>                                                        |                                                                                              |           |                    |                    |
| Poor (Quintiles 1-2)                                                           | 1913(45.02)                                                                                  | 28(54.72) | 1.25 (0.62, 2.49)  |                    |
| Middle (Quintile 3)                                                            | 837(19.69)                                                                                   | 6(10.93)  | 0.57 (0.18, 1.82)  |                    |
| High (Quintiles 4-5)                                                           | 1500(35.29)                                                                                  | 18(34.35) | <b>Reference</b>   |                    |
| <b>Place of residence</b>                                                      |                                                                                              |           |                    |                    |
| Urban                                                                          | 748(17.61)                                                                                   | 6(10.88)  | <b>Reference</b>   |                    |
| Rural                                                                          | 3501(82.39)                                                                                  | 46(89.12) | 1.74 (0.79, 3.86)  | 1.85 (0.88, 3.92)  |
| <b>Maternal age (years)</b>                                                    |                                                                                              |           |                    |                    |
| ≤20                                                                            | 255(6.00)                                                                                    | 3(6.48)   | 0.92 (0.31, 2.71)  | 0.97 (0.33, 2.86)  |
| 21-34                                                                          | 2993(70.42)                                                                                  | 42(83.11) | <b>Reference</b>   | <b>Reference</b>   |
| 35-49                                                                          | 1002(23.58)                                                                                  | 5(10.41)  | 0.38 (0.13, 1.06)  | 0.43 (0.16, 1.16)  |
| <b>Maternal education</b>                                                      |                                                                                              |           |                    |                    |
| Primary & lower                                                                | 2453(57.71)                                                                                  | 29(57.09) | 0.97 (0.51, 1.87)  |                    |
| Secondary & above                                                              | 1973(42.18)                                                                                  | 22(42.91) | <b>Reference</b>   |                    |
| <b>Household member</b>                                                        |                                                                                              |           |                    |                    |
| 1-5                                                                            | 1592(37.45)                                                                                  | 25(49.21) | <b>Reference</b>   | <b>Reference</b>   |
| > 5                                                                            | 2658(62.55)                                                                                  | 26(50.79) | 0.62 (0.34, 1.13)  | 0.62 (0.33, 1.17)  |
| <b>Birth order</b>                                                             |                                                                                              |           |                    |                    |
| 1 <sup>st</sup> children                                                       | 664(15.62)                                                                                   | 6(11.31)  | 0.73 (0.25, 2.10)  |                    |
| 2 <sup>nd</sup> - 4 <sup>th</sup> children                                     | 2456(57.80)                                                                                  | 29(57.39) | <b>Reference</b>   |                    |
| 5 <sup>th</sup> children and above                                             | 1130(26.58)                                                                                  | 16(31.30) | 1.18 (0.53, 2.64)  |                    |
| <b>Sex of child</b>                                                            |                                                                                              |           |                    |                    |
| Male                                                                           | 2205(51.88)                                                                                  | 58(57.84) | <b>Reference</b>   |                    |
| Female                                                                         | 2045(48.12)                                                                                  | 22(42.16) | 0.79 (0.39, 1.59)  |                    |
| <b>Plurality</b>                                                               |                                                                                              |           |                    |                    |
| Single                                                                         | 4179(98.34)                                                                                  | 47(91.74) | <b>Reference</b>   | <b>Reference</b>   |
| Multiple gestation                                                             | 71(1.66)                                                                                     | 4(8.26)   | 5.08 (1.71, 15.06) | 6.15 (2.08, 18.18) |
| <b>Breastfeeding</b>                                                           |                                                                                              |           |                    |                    |
| Yes                                                                            | 4042(95.10)                                                                                  | 46(91.00) | <b>Reference</b>   | <b>Reference</b>   |
| No                                                                             | 208(4.90)                                                                                    | 5(9.00)   | 1.90 (0.69, 5.22)  | 2.04 (0.75, 5.57)  |
| <b>Tobacco/cigarette use history</b>                                           |                                                                                              |           |                    |                    |
| Yes                                                                            | 713(16.79)                                                                                   | 16(31.49) | 2.24 (1.11, 4.54)  | 1.77 (0.79, 3.96)  |
| No                                                                             | 3528(83.02)                                                                                  | 35(68.51) | <b>Reference</b>   | <b>Reference</b>   |
| <b>Alcohol use history</b>                                                     |                                                                                              |           |                    |                    |
| Yes                                                                            | 244(5.73)                                                                                    | 4(7.58)   | 1.33 (0.49, 3.62)  |                    |
| No                                                                             | 3972(93.47)                                                                                  | 47(92.42) | <b>Reference</b>   |                    |
| <b>Kava use history</b>                                                        |                                                                                              |           |                    |                    |
| Yes                                                                            | 80(1.89)                                                                                     | 1(2.15)   | 1.14 (0.24, 5.46)  |                    |
| No                                                                             | 4162(97.93)                                                                                  | 50(97.85) | <b>Reference</b>   |                    |
| <b>Marijuana use history</b>                                                   |                                                                                              |           |                    |                    |
| Yes                                                                            | 89(2.10)                                                                                     | 3(5.66)   | 2.74 (0.75, 10.05) | 1.94 (0.43, 8.73)  |
| No                                                                             | 4154(97.74)                                                                                  | 48(94.34) | <b>Reference</b>   | <b>Reference</b>   |
| <b>Betel nut use history</b>                                                   |                                                                                              |           |                    |                    |
| Yes                                                                            | 3621(85.20)                                                                                  | 47(91.98) | 1.97 (0.64, 6.10)  | 1.44 (0.46, 4.57)  |
| No                                                                             | 626(14.72)                                                                                   | 4(8.02)   | <b>Reference</b>   | <b>Reference</b>   |
|                                                                                |                                                                                              |           |                    |                    |
| <i>Health and reproductive characteristics, weighted population (n = 2706)</i> |                                                                                              |           |                    |                    |
| <b>Antenatal care</b>                                                          |                                                                                              |           |                    |                    |
| Yes                                                                            | 2540(95.42)                                                                                  | 21(100.0) | <b>Reference</b>   |                    |

|                                     |             |           |                   |                   |
|-------------------------------------|-------------|-----------|-------------------|-------------------|
| No                                  | 122(4.58)   | 0(0.00)   |                   |                   |
| <b>Malaria in pregnancy</b>         |             |           |                   |                   |
| Yes                                 | 198(7.44)   | 1(5.83)   | 0.66 (0.13, 3.34) | 0.52 (0.17, 1.66) |
| No                                  | 1976(74.22) | 19(89.00) | <b>Reference</b>  | <b>Reference</b>  |
| <b>Postnatal check</b>              |             |           |                   |                   |
| Yes                                 | 1699(63.83) | 17(79.69) | <b>Reference</b>  |                   |
| No                                  | 955(35.87)  | 4(18.86)  | 0.42 (0.14, 1.24) |                   |
| <b>Place of delivery</b>            |             |           |                   |                   |
| Health Facility                     | 2298(86.34) | 19(92.99) |                   |                   |
| Non health facility                 | 355(12.98)  | 1(7.01)   | 0.50 (0.10, 2.61) |                   |
| <b>Birth attendant</b>              |             |           |                   |                   |
| High skilled                        | 228(8.56)   | 3(12.22)  | <b>Reference</b>  |                   |
| Low or no skilled                   | 2035(76.45) | 16(74.57) | 0.19 (0.03, 1.50) |                   |
| <b>Birth weight (kilograms)</b>     |             |           |                   |                   |
| <2.5 kilograms                      | 2044(76.79) | 20(94.83) | 1.46 (0.31, 6.79) |                   |
| ≥2.5 kilograms                      | 578(21.72)  | 1(5.17)   | <b>Reference</b>  |                   |
| <b>Mode of delivery</b>             |             |           |                   |                   |
| C-section                           | 175(6.58)   | 5(11.36)  | 1.67 (0.33, 8.38) |                   |
| Normal vaginal delivery             | 2114(79.42) | 17(81.63) | <b>Reference</b>  |                   |
| <b>Maternal tetanus vaccination</b> |             |           |                   |                   |
| Yes                                 | 2330(87.53) | 36(81.1)  | <b>Reference</b>  |                   |
| No                                  | 324(12.19)  | 8(18.83)  | 1.23 (0.29, 5.17) |                   |

**Footnotes:** Population comprised of all births (weighted n=4334) and last births (weighted n=2706) born between 2010 and 2015 of the Solomon Islands demographic health survey.

Adjusted analyses were made for all covariates with p-values less than 0.2

Frequencies (n) were rounded to the nearest whole number

**Abbreviations:** CRR; crude relative risk, ARR; adjusted relative risk.

**Supplementary file 4.** Unadjusted and adjusted analysis of sociodemographic, maternal health and behavioural risks for under-five mortality of 2015 SIDHS.

| COVARIATE AND GROUP                                                            | UNDER-FIVE MORTALITY                                                                         |           |                    |                    |
|--------------------------------------------------------------------------------|----------------------------------------------------------------------------------------------|-----------|--------------------|--------------------|
|                                                                                | <i>Sociodemographic, behavioural, health characteristics, weighted population (n = 4334)</i> |           |                    |                    |
|                                                                                | Number (%)                                                                                   |           | RR 95% CI          |                    |
|                                                                                | No (%)                                                                                       | Yes (%)   | CRR                | ARR                |
| <b>Marital status</b>                                                          |                                                                                              |           |                    |                    |
| In union                                                                       | 3865(90.98)                                                                                  | 75(89.57) | <b>Reference</b>   |                    |
| Not in union                                                                   | 383(9.02)                                                                                    | 9(10.43)  | 1.17 (0.55, 2.47)  |                    |
| <b>Religion</b>                                                                |                                                                                              |           |                    |                    |
| Anglican                                                                       | 1286(30.28)                                                                                  | 29(34.78) | 1.44 (0.76, 2.72)  | 1.34 (0.74, 2.42)  |
| Roman Catholic                                                                 | 941(22.14)                                                                                   | 24(29.16) | 1.64 (0.92, 2.95)  | 1.62 (0.90, 2.94)  |
| Protestant & Pentecostal churches                                              |                                                                                              |           | <b>Reference</b>   | <b>Reference</b>   |
| Minor religion <sup>1</sup>                                                    | 349(8.21)                                                                                    | 4(4.87)   | 0.75 (0.25, 2.27)  | 0.83 (0.31, 2.25)  |
| <b>Ethnicity</b>                                                               |                                                                                              |           |                    |                    |
| Melanesian                                                                     | 4107(96.69)                                                                                  | 75(89.41) | <b>Reference</b>   | <b>Reference</b>   |
| Polynesian                                                                     | 84(1.97)                                                                                     | 4(5.00)   | 2.66 (1.26, 5.61)  | 3.23 (1.09, 9.54)  |
| Micronesian                                                                    | 52(1.23)                                                                                     | 5(5.59)   | 4.59 (2.46, 8.58)  | 5.60 (2.52, 12.46) |
| <b>Household wealth</b>                                                        |                                                                                              |           |                    |                    |
| Poor (Quintiles 1-2)                                                           | 1912(45.00)                                                                                  | 45(53.46) | 1.12 (0.64, 1.96)  | 1.14 (0.61, 2.13)  |
| Middle (Quintile 3)                                                            | 837(19.69)                                                                                   | 8(9.09)   | 0.44 (0.18, 1.11)  | 0.41 (0.17, 1.00)  |
| High (Quintiles 4-5)                                                           | 1500(35.31)                                                                                  | 31(37.45) | <b>Reference</b>   | <b>Reference</b>   |
| <b>Place of residence</b>                                                      |                                                                                              |           |                    |                    |
| Urban                                                                          | 748(17.62)                                                                                   | 13(15.21) | <b>Reference</b>   |                    |
| Rural                                                                          | 3500(82.38)                                                                                  | 71(84.79) | 1.19 (0.70, 2.03)  |                    |
| <b>Maternal age (years)</b>                                                    |                                                                                              |           |                    |                    |
| ≤20                                                                            | 1053(24.80)                                                                                  | 17(20.00) | 0.81 (0.32, 2.02)  |                    |
| 21-34                                                                          | 2192(51.61)                                                                                  | 50(59.21) | <b>Reference</b>   |                    |
| 35-49                                                                          | 1002(23.59)                                                                                  | 17(20.79) | 0.84 (0.50, 1.41)  |                    |
| <b>Maternal education</b>                                                      |                                                                                              |           |                    |                    |
| Primary & lower                                                                | 2451(57.70)                                                                                  | 47(56.10) | 0.94 (0.58, 1.52)  |                    |
| Secondary & above                                                              | 1792(42.20)                                                                                  | 37(43.90) | <b>Reference</b>   |                    |
| <b>Household member</b>                                                        |                                                                                              |           |                    |                    |
| 1-5                                                                            | 1592(37.46)                                                                                  | 42(49.71) | <b>Reference</b>   | <b>Reference</b>   |
| > 5                                                                            | 2657(62.54)                                                                                  | 42(50.29) | 0.61 (0.38, 0.97)  | 0.55 (0.33, 0.93)  |
| <b>Birth order</b>                                                             |                                                                                              |           |                    |                    |
| 1 <sup>st</sup> children                                                       | 664(15.62)                                                                                   | 11(13.23) | 1.08 (0.53, 2.18)  |                    |
| 2 <sup>nd</sup> - 4 <sup>th</sup> children                                     | 2455(57.78)                                                                                  | 44(52.74) | <b>Reference</b>   |                    |
| 5 <sup>th</sup> children and above                                             | 1130(26.59)                                                                                  | 29(34.03) | 1.50 (0.71, 3.18)  |                    |
| <b>Sex of child</b>                                                            |                                                                                              |           |                    |                    |
| Male                                                                           | 2203(51.86)                                                                                  | 45(53.37) | <b>Reference</b>   |                    |
| Female                                                                         | 2045(48.14)                                                                                  | 39(46.63) | 0.94 (0.53, 1.68)  |                    |
| <b>Plurality</b>                                                               |                                                                                              |           |                    |                    |
| Single                                                                         | 4177(98.34)                                                                                  | 79(94.03) | <b>Reference</b>   | <b>Reference</b>   |
| Multiple gestation                                                             | 71(1.66)                                                                                     | 5(5.97)   | 3.57 (1.41, 9.03)  | 3.34 (1.26, 8.88)  |
| <b>Breastfeeding</b>                                                           |                                                                                              |           |                    |                    |
| Yes                                                                            | 4040(95.10)                                                                                  | 57(68.45) | <b>Reference</b>   | <b>Reference</b>   |
| No                                                                             | 208(4.90)                                                                                    | 26(31.55) | 8.05 (4.57, 14.17) | 8.65 (4.97, 15.05) |
| <b>Tobacco/cigarette use history</b>                                           |                                                                                              |           |                    |                    |
| Yes                                                                            | 712(16.75)                                                                                   | 20(24.22) | 1.56 (0.88, 2.77)  | 1.48 (0.81, 2.72)  |
| No                                                                             | 3528(83.05)                                                                                  | 64(75.78) | <b>Reference</b>   | <b>Reference</b>   |
| <b>Alcohol use history</b>                                                     |                                                                                              |           |                    |                    |
| Yes                                                                            | 244(5.73)                                                                                    | 8(9.49)   | 1.69 (0.79, 3.60)  | 1.24 (0.52, 2.97)  |
| No                                                                             | 3971(93.47)                                                                                  | 76(90.51) | <b>Reference</b>   | <b>Reference</b>   |
| <b>Kava use history</b>                                                        |                                                                                              |           |                    |                    |
| Yes                                                                            | 80(1.89)                                                                                     | 2(2.29)   | 1.21 (0.35, 4.16)  |                    |
| No                                                                             | 4160(97.93)                                                                                  | 82(97.71) | <b>Reference</b>   |                    |
| <b>Marijuana use history</b>                                                   |                                                                                              |           |                    |                    |
| Yes                                                                            | 89(2.10)                                                                                     | 4(4.42)   | 2.11 (0.71, 6.26)  | 1.35 (0.34, 5.35)  |
| No                                                                             | 4152(97.74)                                                                                  | 80(95.58) | <b>Reference</b>   | <b>Reference</b>   |
| <b>Betel nut use history</b>                                                   |                                                                                              |           |                    |                    |
| Yes                                                                            | 3619(85.20)                                                                                  | 76(90.55) | 1.64 (0.64, 4.21)  | 1.03 (0.39, 2.70)  |
| No                                                                             | 626(14.72)                                                                                   | 8(9.45)   | <b>Reference</b>   | <b>Reference</b>   |
|                                                                                |                                                                                              |           |                    |                    |
| <i>Health and reproductive characteristics, weighted population (n = 2706)</i> |                                                                                              |           |                    |                    |
| <b>Antenatal care</b>                                                          |                                                                                              |           |                    |                    |
| Yes                                                                            | 2540(95.42)                                                                                  | 42(93.32) | <b>Reference</b>   |                    |



|                                     |             |           |                   |                   |
|-------------------------------------|-------------|-----------|-------------------|-------------------|
| No                                  | 122(4.58)   | 3(6.68)   | 1.48 (0.47, 4.70) |                   |
| <b>Malaria infection</b>            |             |           |                   |                   |
| Yes                                 | 198(7.44)   | 3(5.99)   | 0.78 (0.27, 2.30) |                   |
| No                                  | 1974(74.20) | 34(76.92) | <b>Reference</b>  |                   |
| <b>Postnatal check</b>              |             |           |                   |                   |
| Yes                                 | 1697(63.81) | 19(42.44) | <b>Reference</b>  | <b>Reference</b>  |
| No                                  | 595(35.89)  | 24(53.98) | 2.23 (1.09, 4.56) | 1.38 (0.58, 3.26) |
| <b>Place of delivery</b>            |             |           |                   |                   |
| Health facility                     | 2297(86.33) | 42(93.42) | <b>Reference</b>  |                   |
| Non health facility                 | 346(12.99)  | 3(6.58)   | 0.47(0.14, 1.62)  |                   |
| <b>Birth attendant</b>              |             |           |                   |                   |
| High skilled                        | 2042(76.77) | 41(92.60) | <b>Reference</b>  |                   |
| Low or no skilled                   | 578(21.73)  | 3(7.40)   | 0.29 (0.09, 0.93) |                   |
| <b>Birth weight (kilograms)</b>     |             |           |                   |                   |
| <2.5 kilograms                      | 228(8.56)   | 5(11.84)  | 1.89 (0.66, 5.45) | 1.07 (0.16, 7.03) |
| ≥2.5 kilograms                      | 2033(76.43) | 25(55.40) | <b>Reference</b>  | <b>Reference</b>  |
| <b>Mode of delivery</b>             |             |           |                   |                   |
| C-section                           | 175(6.58)   | 7(16.33)  | 2.50 (0.97, 6.42) | 1.13 (0.22, 5.76) |
| Normal vaginal delivery             | 2112(79.41) | 34(77.09) | <b>Reference</b>  | <b>Reference</b>  |
| <b>Maternal tetanus vaccination</b> |             |           |                   |                   |
| Yes                                 | 2330(87.58) | 36(81.17) | <b>Reference</b>  | <b>Reference</b>  |
| No                                  | 323(12.13)  | 8(18.83)  | 1.65 (0.69, 3.93) | 1.67 (0.45, 6.14) |

**Footnotes:** Population comprised of all births (weighted n=4334) and last births (weighted n=2706) born between 2010 and 2015 of the Solomon Islands demographic health survey.

Adjusted analyses were made for all covariates with p-values less than 0.2

Frequencies (n) were rounded to the nearest whole number

**Abbreviations:** CRR; crude relative risk, ARR; adjusted relative risk.

**Supplementary file 5.** Population attributable fractions of sociodemographic, maternal health and behavioural risks for neonatal, infant, child and under-five mortality in the Solomon Islands

| <b>Groups at risk</b>         | <b>Proportion exposed to risks (%)</b> | <b>Adjusted relative risk</b> | <b>Population attributable fraction (%)</b> |
|-------------------------------|----------------------------------------|-------------------------------|---------------------------------------------|
| <b>Neonatal mortality</b>     |                                        |                               |                                             |
| No postnatal check            | 36.32                                  | 11.36                         | 79                                          |
| No breastfeeding              | 5.42                                   | 34.8                          | 65                                          |
| LBW infant                    | 8.82                                   | 2.82                          | 14                                          |
| No tetanus vaccination        | 12.24                                  | 1.79                          | 9                                           |
| <b>Infant mortality</b>       |                                        |                               |                                             |
| No breastfeeding              | 5.42                                   | 11.85                         | 37                                          |
| Postnatal check               | 36.32                                  | 1.58                          | 17                                          |
| Tobacco/cigarette use history | 16.9                                   | 1.42                          | 7                                           |
| Marijuana use history         | 2.67                                   | 1.6                           | 2                                           |
| Multiple births               | 1.75                                   | 2.41                          | 2                                           |
| <b>Child mortality</b>        |                                        |                               |                                             |
| Rural Residence               | 82.43                                  | 1.85                          | 41                                          |
| Tobacco/cigarette use history | 16.9                                   | 1.77                          | 12                                          |
| Multiple gestation            | 1.75                                   | 6.15                          | 8                                           |
| No breastfeeding              | 5.42                                   | 2.04                          | 5                                           |
| Marijuana use history         | 2.67                                   | 1.94                          | 2                                           |
| <b>Under-five mortality</b>   |                                        |                               |                                             |
| No breastfeeding              | 5.42                                   | 8.65                          | 29                                          |
| No tetanus vaccination        | 12.24                                  | 1.67                          | 8                                           |
| Tobacco/cigarette use history | 16.9                                   | 1.48                          | 8                                           |
| Multiple births               | 1.75                                   | 3.34                          | 4                                           |
